# Supplementary material for: An exploration of the relationships of experiential avoidance (as measured by the aaq-ii and meaq) with negative affect, perceived stress, and avoidant coping styles
Source: PeerJ. 2021 Mar 5;9:e11033. doi: 10.7717/peerj.11033 (PMC7938778; doi:10.7717/peerj.11033)
Supplement: Supplemental Information 1 [file peerj-09-11033-s001.xlsx]

## Sheet: Sheet1
Age	Ethnicity	Gender	ED		1	2	3	4	5	6	7	AAQ-II		1	2	3	4	5	6	7	8	9	10	11	12	13	14	15	16	17	18	19	20	21	22	23	24	25	26	27	28	29	30	31	32	33	34	35	36
18	4	Female	12		2	2	1	1	3	2	2	13		3	2	6	2	2	6	1	1	5	1	2	6	5	2	5	4	1	5	5	5	1	5	6	5	3	2	4	1	5	6	4	1	4	6	1	1
18	2,4	Female	12		3	5	5	4	4	3	3	27		5	5	4	5	4	5	1	3	5	4	4	5	3	3	4	1	3	4	3	4	5	6	1	4	4	4	3	2	3	3	3	4	4	5	6	3
18	4	Female	12		2	4	1	1	2	2	2	14		5	4	4	5	3	4	1	1	5	2	2	6	4	3	4	2	1	4	2	5	1	5	5	4	3	1	3	2	3	6	4	2	4	5	5	2
18	1,4	Female	14		2	4	4	3	4	5	5	27		5	6	3	4	5	4	2	3	5	1	6	4	4	5	6	1	6	4	4	5	2	6	3	4	3	5	4	3	3	2	5	4	6	1	5	6
20	2	Female	14		5	4	2	4	4	1	6	26		6	5	4	4	3	3	1	3	4	4	4	4	4	5	5	3	4	3	4	5	6	6	6	5	5	5	5	3	5	6	6	5	5	6	3	4
18	1	Female	12		7	4	6	7	4	7	7	42		5	6	4	5	4	3	3	4	6	5	4	3	5	3	6	4	5	3	5	6	3	6	6	3	5	3	6	4	3	3	6	2	6	3	6	4
18	4	Female	12		1	2	4	1	3	3	3	17		4	2	4	1	3	6	2	1	5	1	5	3	5	2	4	6	3	6	2	3	1	5	5	6	2	3	2	1	6	6	5	5	5	5	5	3
18	1	Female	12		2	4	5	2	5	6	5	29		4	4	6	4	5	6	3	2	6	1	4	5	2	4	4	1	6	3	4	6	4	5	4	3	3	4	5	1	3	3	4	3	4	4	1	5
18	4	Female	12		5	4	6	5	5	5	6	36		5	4	5	5	5	4	4	2	5	5	5	5	4	4	5	4	5	4	4	4	4	5	4	6	6	4	4	5	5	5	5	3	5	5	6	5
18	2	Female	12		3	3	3	2	2	3	2	18		6	4	4	3	4	5	5	4	4	2	4	5	4	6	5	1	6	2	5	5	1	5	6	4	6	1	5	1	6	5	4	4	6	6	1	5
18	4,6	Female	12		5	1	6	6	5	3	4	30		6	6	4	1	1	6	1	1	4	1	1	5	6	1	2	1	1	2	4	5	1	2	6	4	6	3	5	1	4	6	5	3	6	5	1	1
18	4	Female	12		1	2	1	1	1	2	1	9		5	3	3	4	2	5	1	2	5	3	3	4	6	4	5	2	3	2	3	2	1	4	5	3	2	4	3	2	5	5	4	4	3	3	1	2
18	4	Female	12		2	2	3	1	2	1	1	12		5	4	3	3	4	4	4	3	3	2	4	5	5	3	4	2	3	3	4	2	3	3	4	5	3	4	3	4	5	5	5	4	2	3	3	4
18	4	Female	12		2	5	7	2	5	2	3	26		5	2	6	6	5	4	1	4	6	4	4	6	1	3	5	1	1	2	6	6	1	6	4	6	4	5	6	4	1	6	4	2	6	1	6	4
18	4	Female	12		4	4	5	3	3	5	4	28		5	3	4	2	3	5	1	2	3	2	5	5	3	3	5	3	3	3	2	2	1	4	5	5	2	5	3	1	4	4	3	3	4	2	5	3
18	1	Female	12		1	2	3	1	2	3	2	14		5	3	5	4	3	5	6	5	5	3	4	2	5	5	5	5	5	2	4	2	5	5	6	6	4	6	6	3	6	5	4	5	5	5	6	6
18	2	Female	12		5	5	2	4	1	6	3	26		3	6	6	2	6	5	1	2	6	1	6	4	4	1	6	6	6	4	4	1	2	6	3	5	2	1	6	1	6	5	4	3	6	4	6	6
19	2,4	Female	14		4	6	6	3	4	7	5	35		2	4	4	5	2	4	1	1	6	2	3	6	5	2	6	5	2	2	6	5	2	6	4	6	5	5	5	1	3	6	6	3	6	3	5	2
18	4	Female	12		1	2	1	1	1	1	3	10		2	1	6	2	1	2	1	1	6	1	1	4	5	2	3	4	1	5	1	6	1	5	5	4	2	4	3	1	3	6	5	4	2	6	3	1
18	4	Female	12		1	1	1	1	2	5	2	13		1	1	4	4	6	6	1	1	6	6	6	5	4	2	4	4	6	6	2	4	4	5	6	4	6	2	6	1	6	4	5	2	3	3	3	4
18	1	Female	14		4	6	6	3	4	4	4	31		4	4	3	6	4	5	4	4	5	2	3	4	6	4	5	2	3	4	3	5	4	5	3	4	6	3	4	1	3	4	6	3	5	6	5	5
18	1	Female	14		3	4	2	2	5	3	4	23		3	2	5	4	3	5	2	2	4	2	6	6	5	3	5	3	1	2	3	3	4	4	3	3	3	4	5	4	5	4	4	3	4	4	2	4
20	1,4	Female	13		3	5	3	3	5	7	4	30		2	2	1	4	5	6	2	1	3	1	5	6	2	2	1	4	3	5	1	4	2	5	5	6	2	1	3	1	6	4	2	1	3	1	4	4
23	1	Female	17		1	1	2	1	2	2	1	10		2	2	4	4	2	4	1	1	2	1	1	5	4	2	4	4	2	2	1	1	1	5	2	3	1	2	1	1	6	2	4	3	4	1	2	2
18	1	Female	12		3	2	4	1	3	5	4	22		4	1	2	6	5	6	2	2	4	1	3	4	6	5	3	1	5	3	5	3	1	6	6	4	3	5	5	1	5	6	6	4	4	1	6	5
18	4	Female	12		4	3	4	4	5	7	4	31		6	4	2	5	5	3	2	2	2	2	5	4	3	3	4	2	6	4	6	4	6	4	4	4	5	3	3	1	5	3	4	5	4	6	4	6
18	2,4	Female	12		4	5	5	2	5	5	6	32		5	1	5	6	6	4	2	5	5	5	5	6	5	5	6	1	5	1	6	4	5	5	4	5	1	5	5	5	2	4	5	2	4	3	6	6
18	4	Female	12		2	2	1	1	3	2	1	12		4	6	4	1	2	5	4	1	4	5	3	5	5	2	1	5	2	4	4	4	2	3	5	6	2	6	4	1	5	4	4	2	5	5	6	2
18	1,4	Female	13		1	1	3	1	4	1	1	12		5	4	5	5	3	4	2	1	5	1	4	5	4	3	4	1	2	1	5	5	2	6	6	6	3	4	5	1	3	6	5	3	6	4	1	4
18	1	Female	12		3	7	7	3	7	7	7	41		5	4	6	6	5	4	1	1	6	4	2	5	6	4	6	4	6	5	3	6	1	6	2	5	4	5	5	1	4	3	6	4	6	6	6	6
18	4	Female	12		1	1	1	1	3	1	1	9		6	2	1	1	4	6	1	6	4	2	4	6	3	4	2	1	1	2	1	3	1	5	5	5	1	1	3	1	6	6	5	2	5	6	4	5
18	6	Female	12		4	6	7	3	7	7	7	41		6	5	4	6	5	6	1	1	6	4	6	6	6	5	6	1	6	1	5	1	1	6	6	6	4	2	6	6	6	1	1	4	6	4	1	5
19	4	Female	12		3	5	2	1	2	6	5	24		3	1	2	5	6	4	1	1	1	1	4	4	5	4	3	1	4	4	5	6	1	6	4	6	1	4	3	1	4	3	6	3	6	1	5	6
18	5	Female	12		3	2	3	2	4	2	3	19		3	4	5	2	4	4	1	2	4	3	5	6	4	3	4	4	3	4	2	4	1	3	6	4	1	3	4	2	5	2	5	3	2	4	1	4
18	1	Female	12		2	2	2	1	2	2	2	13		5	4	6	4	4	5	2	3	5	4	4	4	4	4	4	3	4	3	3	3	4	5	5	3	4	3	4	3	3	4	4	4	5	3	4	4
21	4	Female	15		2	4	3	1	2	3	1	16		2	1	2	3	3	6	1	1	2	1	3	6	1	1	3	2	2	4	1	1	1	2	6	5	1	2	2	2	6	6	1	1	1	5	1	1
18	3,4	Female	13		4	5	3	3	4	2	6	27		5	4	3	4	2	4	2	2	4	1	1	5	3	3	4	2	2	2	4	5	2	5	3	5	5	3	4	1	4	4	4	1	4	5	3	2
19	1	Female	14		1	4	1	1	1	1	4	13		3	2	3	4	4	5	2	1	4	1	3	5	1	1	4	4	1	5	2	1	2	2	4	5	1	1	4	1	5	4	4	2	4	4	4	4
18	4	Female	12		4	5	6	4	5	5	7	36		2	1	3	4	3	6	1	1	3	3	6	5	4	3	4	1	6	6	2	6	1	5	6	6	2	3	4	1	5	6	6	2	5	6	3	3
21	1	Female	16		4	4	5	5	5	7	7	37		1	6	6	6	6	6	4	4	6	6	6	6	6	4	6	2	6	6	3	6	6	6	4	6	6	6	6	6	6	6	6	6	6	6	4	6
18	4	Female	12		1	1	2	1	1	1	2	9		5	2	3	4	4	4	2	4	6	1	6	5	3	2	4	1	4	4	4	4	1	5	4	4	4	3	4	1	3	2	4	2	5	3	1	4
18	1	Female	14		2	2	1	2	3	5	2	17		5	6	4	4	3	4	3	3	4	2	3	4	4	3	4	5	4	4	3	4	3	4	3	4	4	3	4	3	4	4	5	4	5	3	5	4
18	4	Female	12		2	2	1	1	2	4	2	14		3	2	5	4	4	6	1	1	4	1	5	5	6	4	5	2	5	5	3	4	1	3	5	5	4	4	5	1	6	5	5	4	4	5	2	5
19	4	Female	12		2	4	5	1	4	5	4	25		4	4	4	6	4	6	1	1	5	1	5	1	5	3	5	4	4	3	4	3	1	4	1	4	3	3	4	1	3	2	6	2	4	3	6	3
20	4	Female	14		3	3	5	2	5	6	6	30		2	2	6	5	6	6	2	1	6	3	5	4	4	5	6	2	4	4	5	5	1	6	4	3	5	3	4	1	5	3	5	2	6	1	2	5
19	4	Female	14		5	5	6	4	6	7	7	40		4	6	3	6	5	3	2	1	3	1	5	4	6	2	5	1	6	4	2	4	2	4	6	6	5	3	3	1	2	4	6	3	4	3	6	5
21	4	Female	14		3	3	4	3	2	4	3	22		5	4	4	4	5	5	2	4	5	2	4	6	5	3	4	3	3	3	5	4	2	3	4	4	4	3	3	4	4	5	5	4	4	3	4	4
19	4	Female	14		1	2	2	1	1	1	1	9		1	2	3	2	2	6	2	1	5	1	2	6	2	1	5	2	1	6	3	3	1	5	5	6	2	1	2	1	6	6	3	1	2	2	1	1
18	4	Female	12		1	2	1	1	1	1	1	8		4	3	3	1	5	4	4	1	5	1	6	5	2	2	3	2	4	1	4	4	3	4	6	4	3	2	4	1	4	5	5	4	3	4	1	5
18	1	Female	12		2	3	2	1	3	4	4	19		4	2	2	5	5	5	1	1	1	4	5	4	3	1	1	1	5	4	5	4	2	1	1	6	5	1	5	2	5	3	5	2	2	4	5	5
19	4	Female	14		4	6	6	3	5	6	5	35		4	6	3	5	6	3	2	4	4	3	6	5	6	5	4	3	4	2	1	1	4	2	1	1	3	5	3	2	3	2	6	1	3	3	6	3
18	1	Female	12		6	4	6	6	6	4	6	38		6	6	2	6	2	6	1	3	2	1	6	3	1	6	3	2	5	3	6	2	2	1	3	5	6	6	2	5	3	2	2	4	3	6	6	6
18	4	Female	12		5	4	3	4	4	2	2	24		2	3	2	2	2	6	3	2	4	1	1	5	5	2	3	1	4	4	4	3	2	4	4	5	4	2	2	2	5	5		2	3	3	3	3
18	4	Female	12		1	1	1	1	1	2	1	8		1	2	2	1	3	5	1	1	4	2	3	5	4	3	4	1	2	6	3	3	2	4	6	6	3	2	2	4	6	6	2	1	5	4	1	1
22	4	Female	16		4	5	5	4	5	4	6	33		5	6	4	6	6	3	3	5	3	1	5	3	4	3	5	4	5	4	6	4	6	6	3	5	5	5	5	3	2	2	4	4	6	6	6	6
19	4	Female	13		3	3	5	3	4	5	6	29		6	4	5	4	5	4	1	3	5	2	6	4	3	4	5	3	6	3	4	5	3	5	4	4	3	5	5	3	3	4	5	5	4	4	4	5
19	4	Female	13.5		6	7	6	6	6	7	6	44		2	2	5	6	6	5	1	3	5	6	6	4	4	2	5	1	3	4	4	5	3	6	6	6	3	4	5	6	5	4	3	2	4	2	6	5
18	4	Female	12		2	1	1	1	1	1	2	9		3	4	3	3	3	3	3	3	2	3	3	3	3	3	2	2	3	3	3	3	3	3	3	3	4	4	4	2	4	4	4	3	4	4	4	4
20	4	Female	13.5		2	4	2	1	1	2	1	13		5	5	3	4	3	5	1	1	4	1	4	6	3	2	4	1	3	4	4	2	1	4	4	4	2	1	2	1	6	3	1	2	2	3	5	2
18	4	Female	12		2	2	7	6	7	7	7	38		2	4	4	1	1	5	1	1	2	1	5	6	2	2	4	1	6	5	1	3	1	2	6	6	4	1	1	1	1	1	3	1	3	1	1	6
18	1	Female	12		3	4	1	7	7	7	7	36		2	6	6	4	2	4	6	2	6	2	4	4	6	3	5	6	6	6	6	5	6	6	5	5	6	4	6	1	4	4	6	4	6	6	6	6
20	1	Female	14		3	5	5	3	6	7	7	36		6	6	6	6	6	6	1	1	6	4	6	6	6	5	6	1	1	1	4	4	3	6	6	5	6	5	6	1	5	6	6	3	6	5	6	5
22	1	Female	15		1	1	3	1	3	2	3	14		5	4	4	3	3	4	2	2	4	2	2	2	2	2	2	2	2	5	2	4	2	2	5	5	5	4	5	2	5	4	4	4	2	2	5	2
18	4	Female	12		2	2	4	3	5	5	5	26		3	6	4	2	5	5	5	3	4	4	5	3	3	4	2	1	5	2	5	5	3	4	4	4	3	3	3	3	4	4	4	3	4	5	3	4
18	4	Female	12		3	1	1	1	2	3	1	12		6	3	5	2	4	5	6	3	5	1	2	6	3	6	4	3	5	4	6	3	1	5	6	6	5	4	6	1	5	6	3	3	5	6	1	2
18	4	Female	12		1	2	4	1	4	4	3	19		6	2	2	1	5	4	1	5	3	1	6	4	4	4	4	1	5	4	5	4	1	4	6	6	3	6	4	1	2	4	6	4	3	6	2	6
18	4	Female	12		1	1	1	1	4	3	4	15		3	4	4	2	5	5	1	3	5	2	4	5	3	4	4	1	4	4	2	3	1	3	6	6	2	2	3	1	5	5	3	2	2	1	3	4
19	4	Female	12		3	1	4	2	4	4	4	22		4	2	4	2	4	5	2	4	5	2	5	5	5	3	5	2	5	5	3	4	1	4	6	6	4	6	4	1	5	6	4	4	4	4	1	4
19	4	Female	13		2	4	1	1	3	2	2	15		4	1	2	4	4	5	1	1	4	1	3	5	1	1	4	4	3	3	1	2	1	4	4	5	1	2	1	1	3	5	1	2	4	1	4	2
18	4	Female	13		1	2	2	1	1	3	2	12		4	2	3	4	5	5	1	2	4	1	2	5	3	2	3	3	4	4	5	2	1	3	4	3	2	1	2	1	6	4	2	4	2	1	1	2
21	4	Female	12		4	1	6	2	2	3	6	24		5	4	5	3	6	3	4	3	4	3	2	4	4	4	3	1	2	4	5	3	2	4	4	6	4	4	4	1	3	2	5	2	4	5	2	2
20	4	female	14		2	4	4	2	3	3	4	22		3	3	5	3	3	5	2	2	4	2	3	6	3	2	3	1	3	5	3	5	4	4	5	6	2	2	4	2	5	5	5	2	3	2	2	2
22	1	female	17		4	5	4	3	4	5	6	31		3	2	3	4	5	5	1	2	6	4	6	6	3	2	4	1	6	2	3	4	3	5	6	4	4	3	4	5	6	4	5	2	4	4	4	6
19	4	female	13		3	3	2	2	3	3	2	18		4	5	4	3	4	5	2	2	5	1	5	5	4	3	4	2	4	5	5	5	4	5	5	6	5	2	5	2	6	5	5	2	5	5	4	4
18	4	female	13		2	4	4	2	3	4	3	22		6	4	3	4	1	3	4	2	3	2	1	6	2	4	3	1	1	4	4	5	1	4	5	5	3	6	4	2	3	6	4	4	4	3	3	1
18	4	female	12		2	5	5	2	4	6	6	30		2	2	5	6	6	2	3	2	5	5	6	3	2	1	3	4	6	4	3	4	6	5	2	4	4	5	2	3	5	2	3	3	5	6	5	6
18	4	Female	12.5		2	4	5	3	4	4	5	27		4	3	4	5	6	4	1	3	4	3	5	5	4	3	6	2	5	4	3	4	2	5	2	5	3	4	3	2	4	4	4	3	5	3	4	6
19	4	female	13		5	4	7	5	6	6	5	38		5	4	5	4	5	4	2	1	4	4	4	4	5	4	4	1	4	2	4	4	2	4	4	4	2	3	4	2	1	3	6	3	4	4	1	2
19	1	female	14		4	5	4	3	4	6	3	29		5	4	4	4	5	5	3	2	4	1	5	5	4	3	5	2	4	3	4	3	5	5	3	5	5	4	4	2	2	2	5	2	5	4	5	4
18	4	Female	12.5		3	2	2	2	3	5	5	22		4	2	3	5	4	4	1	2	4	4	4	4	4	3	4	4	3	4	2	4	3	4	4	5	2	3	3	4	3	3	3	2	4	3	4	4
18	4	female	12.5		2	3	4	1	3	5	3	21		6	2	4	3	5	6	2	5	5	2	5	3	5	5	5	3	5	3	2	5	4	5	6	5	2	5	5	2	3	5	5	3	4	4	2	4
18	4	Female	13		2	2	2	1	1	1	2	11		2	2	3	3	4	5	1	2	4	4	2	5	4	2	3	2	2	4	1	3	2	3	5	5	2	4	2	3	5	5	3	3	3	2	3	4
22	4	Female	15		3	6	4	3	5	4	5	30		5	4	4	2	5	2	2	4	3	4	5	4	4	4	3	5	6	3	3	4	2	3	1	4	3	4	4	5	3	2	4	3	4	4	5	5
21	4	Female	15		3	6	5	3	4	5	4	30		5	4	5	6	6	3	4	5	5	2	6	5	4	4	5	4	6	3	4	5	5	5	2	3	4	5	6	2	5	2	4	5	5	3	3	6
18	1	Female	12		4	7	4	3	2	5	4	29		2	2	3	5	2	5	1	4	2	2	4	5	2	1	3	2	4	5	4	3	3	3	3	6	2	4	3	2	4	5	4	3	3	3	5	3
20	4	female	13		1	4	4	4	4	5	5	27		3	3	4	5	4	5	2	2	4	2	4	6	5	2	5	6	4	5	3	3	2	4	1	6	6	2	4	3	6	5	4	1	4	4	6	2
18	4	Female	12		3	4	3	4	2	1	4	21		6	2	5	1	1	5	1	5	5	1	5	3	6	4	6	6	1	3	6	6	3	2	6	6	4	6	5	1	1	5	4	4	6	1	1	3
29	4	Female	14		4	4	5	3	4	4	3	27		4	3	4	5	4	5	2	3	4	3	4	6	4	3	4	4	2	5	3	3	2	4	4	5	3	3	3	2	6	4	3	2	4	3	4	3
18	1	Female	12		5	5	6	6	6	6	6	40		6	4	6	6	6	4	3	3	6	6	6	4	6	5	6	4	4	4	4	4	5	6	4	4	4	5	5	4	4	3	5	4	5	3	5	5
18	4	Female	14		2	2	1	2	2	2	2	13		3	1	3	3	4	6	4	1	4	1	5	6	1	2	2	4	3	4	4	4	5	3	5	6	2	3	4	1	5	5	2	1	5	4	2	4
18	1	female	12		5	6	7	5	7	6	6	42		5	6	6	5	5	2	5	4	5	5	6	4	6	5	5	4	5	6	5	5	6	5	2	5	5	5	5	5	2	2	5	5	5	5	6	6
20	4	Female	13		4	4	4	3	4	5	4	28		4	4	3	3	5	3	3	3	4	3	6	3	5	4	6	4	6	3	4	3	3	5	4	3	3	5	4	2	3	3	6	4	4	4	4	6
18	4	Female	12		2	4	3	2	4	5	4	24		4	5	6	5	3	4	3	4	6	2	5	3	5	4	5	4	6	4	4	5	2	6	4	5	4	5	4	5	4	3	6	3	6	3	2	4
18	1	female	12.5		2	3	7	2	7	7	7	35		6	6	6	6	6	4	6	6	6	6	6	6	6	3	3	1	6	6	6	6	4	3	6	6	6	6	6	4	6	6	6	6	2	3	4	6
19	4	Female	13		5	5	6	5	6	6	6	39		3	4	3	5	4	5	3	2	4	2	5	5	4	3	4	1	5	4	3	3	2	2	6	5	5	4	3	3	3	4	4	3	3	4	1	4
20	4	Female	15		1	1	1	1	2	2	2	10		2	3	3	2	3	5	2	2	4	1	3	5	5	2	5	2	2	4	2	2	2	4	6	4	4	2	4	1	5	5	5	2	4	6	2	3
18	4	Female	12		5	6	5	5	5	6	5	37		5	6	6	5	5	4	2	3	5	4	5	4	4	4	6	6	4	4	4	4	2	5	3	4	5	4	5	2	5	3	5	3	5	4	6	4
18	4	Female	12		4	2	2	1	2	3	1	15		5	2	4	2	3	4	1	1	5	2	5	4	3	2	4	3	1	4	5	2	3	2	6	5	2	3	3	2	5	4	3	3	3	2	2	4
18	4	Female	12		3	5	6	2	4	6	5	31		3	1	4	6	6	4	2	3	4	3	6	3	5	3	4	2	5	3	2	3	1	4	4	4	4	5	3	4	3	2	5	1	4	4	3	5
18	4	Female	12		4	5	6	3	5	2	5	30		5	2	3	5	4	4	2	3	5	3	5	4	3	4	5	6	5	4	3	4	4	5	4	5	3	5	4	2	5	4	5	2	4	3	5	3
18	4	female	12		2	3	2	2	4	2	2	17		2	1	3	1	2	6	1	1	4	2	4	5	4	2	4	1	3	4	1	4	2	5	6	5	3	3	3	1	6	5	6	2	4	4	2	2
20	6	Female	14		4	3	5	4	6	3	7	32		4	4	4	3	5	4	3	2	5	2	4	5	4	2	4	2	5	2	4	4	5	4	6	3	4	4	2	2	3	4	5	2	3	4	4	4
21	4	female	15		3	2	5	2	4	5	4	25		3	6	2	4	3	3	1	3	3	1	2	5	2	3	3	4	4	3	3	2	2	5	6	4	2	3	3	2	3	5	4	2	3	1	2	3
19	2	Female	14		2	4	5	1	5	6	6	29		5	5	6	6	6	6	1	5	5	5	6	5	5	5	6	1	4	3	5	3	1	4	5	6	5	6	6	4	4	6	6	6	3	6	6	6
18	4	female	12		2	4	5	2	4	4	5	26		4	3	5	4	5	4	1	2	5	4	5	5	4	2	5	2	4	4	4	5	2	4	5	5	5	3	4	2	4	4	4	2	4	3	4	4
20	4	Female	14		1	1	2	1	3	2	4	14		4	4	4	2	2	5	2	4	5	1	4	5	5	4	4	3	2	2	4	4	2	4	5	4	4	3	4	1	5	5	5	2	4	4	2	3
18	4	Female	12		5	6	6	4	7	7	7	42		5	6	6	5	6	4	5	1	6	4	6	5	6	4	5	1	6	4	6	6	6	6	6	5	5	4	5	4	4	3	6	3	6	4	5	6
21	4	female	15		4	4	3	3	5	5	5	29		5	6	5	4	4	5	2	3	4	2	3	4	3	3	4	1	4	4	5	4	2	4	5	4	3	5	4	4	4	4	5	3	5	4	2	4
18	1	Female	13		4	5	5	4	6	6	5	35		5	4	6	6	6	5	1	2	5	5	5	4	4	2	5	6	4	4	2	2	2	4	2	4	4	3	4	2	3	3	3	3	5	3	5	4
18	4	female	12		5	6	5	5	4	5	5	35		5	4	4	4	5	4	2	4	3	3	4	3	4	3	4	6	5	5	2	4	4	4	5	4	4	5	4	1	3	4	4	4	4	3	6	5
18	4	female	12		4	3	4	4	6	7	6	34		6	4	3	3	3	3	5	6	2	3	5	5	6	6	3	1	1	6	4	3	1	3	6	6	6	6	3	4	1	6	6	6	3	4	3	3
18	4	Female	12		2	5	6	3	5	4	4	29		5	5	4	5	5	4	4	5	3	3	4	4	4	3	3	1	3	3	4	4	2	4	4	5	4	4	4	2	4	4	5	2	4	5	6	4
19	6	Female	12		2	1	3	2	3	4	4	19		6	4	3	4	5	4	1	2	5	1	6	5	5	3	5	3	6	2	3	3	1	5	4	4	5	2	3	2	5	4	6	3	4	5	4	6
20	4	female	14		6	5	6	6	4	6	6	39		5	1	3	6	4	4	5	1	1	3	5	5	2	4	1	6	6	4	4	2	5	1	4	5	5	1	2	2	5	4	6	2	2	5	6	5
27	4	Female	15		2	4	2	2	2	4	2	18		3	5	5	4	4	3	3	3	4	1	5	4	4	3	5	2	4	4	4	4	2	4	5	4	5	2	4	1	4	4	6	3	4	6	4	4
22	4	Female	16		3	4	2	1	4	5	5	24		4	2	5	6	6	4	1	4	5	1	6	4	3	2	5	1	5	4	3	5	4	4	6	4	4	4	4	4	4	5	3	4	3	2	1	5
21	2	Female	15		4	4	4	4	3	4	6	29		5	5	6	3	4	3	4	3	4	1	4	6	5	4	5	2	4	3	5	5	6	5	4	4	5	3	5	1	5	4	5	2	5	4	5	4
34	1	Female	15		2	2	2	2	2	4	3	17		5	3	4	3	4	4	2	4	4	1	4	5	4	5	5	4	5	3	3	5	3	5	5	4	4	4	4	2	4	4	4	5	4	4	2	4
19	4	female	12		3	2	2	3	3	3	4	20		4	2	4	4	3	5	2	1	4	4	4	4	3	3	4	2	4	4	3	3	3	4	3	3	2	4	4	2	5	4	4	3	4	4	4	4
19	4	Female	13		3	5	5	3	5	6	7	34		6	4	5	4	5	2	3	5	4	2	5	3	6	4	5	5	6	3	5	3	5	5	4	3	5	6	5	5	2	3	5	3	5	2	4	5
18	6	Female	13		2	3	4	1	5	3	2	20		5	3	3	2	5	4	2	3	4	2	5	5	4	5	4	1	3	4	5	5	2	4	6	5	5	4	2	2	4	5	5	4	5	5	1	4
19	4	female	13		2	5	6	3	4	3	2	25		6	3	5	2	4	4	1	6	4	1	4	5	5	4	4	1	2	3	4	5	1	4	5	3	3	4	6	3	3	3	6	2	5	1	2	3
19	1	female	14		3	5	4	2	5	7	4	30		5	6	3	1	6	4	2	1	2	5	6	4	2	4	2	1	6	6	3	3	1	3	5	5	4	3	4	4	4	1	5	4	3	1	1	6
18	4	female	12		3	2	4	4	3	3	3	22		6	4	2	1	2	4	1	3	5	2	3	4	5	4	5	3	2	3	4	4	1	3	6	4	2	3	4	1	6	5	4	3	4	5	2	4
18	4	female	12		4	5	5	3	5	5	4	31		4	6	5	6	4	6	5	4	5	5	6	6	5	4	5	3	6	5	6	6	4	5	5	6	5	2	6	4	6	6	6	4	4	6	3	5
19	4	Female	14		2	4	4	2	5	4	4	25		6	4	5	5	4	2	3	4	4	2	4	4	3	4	3	2	4	4	5	5	3	4	5	5	3	5	3	3	4	4	6	3	3	5	3	4
19	4	female	13		5	7	5	6	6	4	5	38		5	4	5	6	5	4	5	3	4	3	5	4	4	3	5	3	5	4	2	1	2	5	1	5	3	4	3	4	3	2	5	3	4	3	5	4
18	1	female	13		4	2	4	5	3	6	4	28		2	1	5	2	3	5	1	2	5	2	5	5	1	2	4	5	5	5	1	3	4	4	3	5	2	2	2	1	5	5	3	1	5	4	4	3
20	1	female	13		2	1	3	1	3	2	2	14		5	3	3	2	2	5	5	3	3	1	2	4	4	5	2	2	3	3	4	4	2	5	5	4	5	3	5	2	4	6	5	3	5	5	4	3
18	4	Female	12.5		4	4	3	4	5	5	6	31		5	5	6	5	6	5	1	2	5	4	4	5	5	4	6	2	4	5	4	4	2	5	5	6	4	3	5	2	4	4	5	3	5	6	2	4
18	4	Female	13		2	5	4	2	6	6	6	31		4	5	6	4	4	4	2	1	6	3	4	4	3	4	5	5	5	3	4	4	6	5	4	5	4	4	4	3	2	3	4	4	4	3	2	4
21	4	Female	15		3	2	2	2	2	1	4	16		2	4	3	2	2	5	1	2	2	1	4	4	2	2	4	2	5	3	2	3	2	4	5	5	5	5	3	1	5	6	4	2	2	2	1	3
19	4	Female	14		4	4	5	2	5	4	5	29		5	6	4	5	4	3	2	2	4	5	4	5	5	2	3	2	4	4	2	4	4	4	5	4	3	4	5	1	5	6	4	2	4	6	2	4
19	4	female	13.5		4	5	5	4	6	5	5	34		5	4	3	6	6	4	1	1	4	4	6	3	3	3	5	2	5	3	2	3	3	3	5	5	3	4	3	2	3	3	6	3	2	6	6	4
19	1	female	12		4	5	6	3	5	6	5	34		6	2	5	2	5	4	1	1	4	1	4	5	3	3	3	1	3	4	3	3	1	4	3	4	4	4	5	1	5	4	5	3	3	3	1	4
22	2	Female	9		2	4	4	1	1	3	2	17		3	4	4	1	4	4	2	3	4	1	5	6	4	2	2	1	4	5	4	3	3	2	4	4	4	2	3	1	5	4	4	2	5	4	5	4
19	4	female	13		4	5	5	4	5	4	3	30		4	5	2	4	5	5	2	4	3	5	5	5	4	4	4	5	5	5	4	4	2	4	1	5	2	3	4	3	4	4	5	4	4	2	6	4
18	2	Female	12		1	3	2	2	2	3	3	16		4	2	5	4	5	4	3	2	3	2	4	3	5	4	5	2	4	3	3	3	2	3	6	6	3	2	3	2	2	3	5	4	3	4	4	3
18	1	Female/Nonbinary	13		4	5	3	4	4	5	3	28		3	5	4	6	4	4	3	2	4	4	3	5	4	4	5	5	4	4	3	4	1	4	3	4	4	3	4	2	5	4	4	2	3	4	6	4
18	6	female	12		2	3	4	1	2	1	2	15		6	4	5	4	4	5	5	2	4	2	2	4	5	2	4	2	4	4	3	3	2	3	5	5	4	2	4	1	5	5	5	2	5	3	1	3
18	4	female	13		4	6	5	5	5	6	5	36		5	6	6	6	6	6	5	3	6	4	6	5	5	3	5	4	6	4	5	5	3	6	4	4	6	6	2	4	3	4	6	5	6	6	6	6
18	4	Female	12		3	4	5	3	6	7	6	34		5	5	6	6	6	4	3	4	5	2	5	2	4	3	5	2	5	3	3	5	1	5	4	3	5	6	4	2	2	2	4	3	5	5	2	5
20	2	Female	13.5		4	3	3	4	4	3	4	25		5	4	3	4	5	4	5	3	3	2	4	4	4	5	4	2	4	4	6	5	2	4	4	4	5	4	4	3	4	3	4	4	4	5	2	4
21	4	Female	14		4	6	5	4	6	5	5	35		2	4	6	6	5	6	1	4	6	4	4	5	5	3	6	4	4	6	4	2	5	4	3	4	4	5	6	1	6	6	3	2	4	3	6	3
21	4	Female	14		4	6	5	4	6	5	5	35		2	4	6	6	5	6	1	4	6	4	4	5	5	3	6	4	4	6	4	2	5	4	3	4	4	5	6	1	6	6	3	2	4	3	6	3
20	4	Female	15		3	4	3	2	4	4	5	25		5	3	4	5	4	5	1	2	4	2	4	6	4	3	4	5	2	5	3	5	4	5	5	6	6	2	4	1	5	6	6	3	4	4	5	4
18	1	Female	12.5		5	5	6	5	5	6	5	37		4	2	4	6	4	4	1	2	4	3	4	5	4	2	4	6	4	4	2	3	2	4	1	4	2	3	4	2	3	2	4	3	4	2	6	4
19	4	Female	14		4	4	4	4	5	5	5	31		4	6	5	5	5	4	2	2	4	4	5	5	5	5	5	5	5	5	5	5	5	5	5	5	5	5	5	5	5	5	5	5	5	5	5	5
18	4	Female	13		5	7	6	4	5	7	6	40		3	4	5	6	6	5	3	2	5	3	6	4	6	3	6	2	6	5	5	3	4	5	6	6	5	4	4	3	4	5	6	5	5	4	3	6
18	6	female	12		2	2	6	2	5	2	3	22		6	5	5	3	6	4	2	2	5	1	5	5	4	2	6	3	4	3	4	5	2	4	5	4	3	3	4	2	4	3	4	2	4	2	1	6
18	4	Female	12		2	2	1	1	3	3	2	14		3	1	4	2	5	4	2	2	5	2	3	4	4	2	5	2	2	5	2	5	2	2	4	5	4	1	2	3	4	4	2	1	5	3	5	3
20	1	Female	14		2	5	5	2	3	6	6	29		5	5	5	5	5	4	5	4	5	4	6	3	3	4	5	3	6	3	5	4	3	5	3	3	4	5	3	5	3	3	3	4	5	2	4	5
23	4	female	17		4	5	4	4	5	5	4	31		4	5	4	4	5	6	2	2	3	3	5	4	3	3	5	6	4	4	4	4	2	4	3	5	4	3	4	3	4	2	4	3	5	6	5	5
19	1	female	14		2	2	2	1	1	2	2	12		5	2	4	3	5	4	3	3	4	2	5	4	4	3	4	4	4	1	5	5	4	4	6	3	4	3	4	2	5	3	2	3	4	4	1	4
18	4	Male	12		1	2	4	1	3	3	4	18		6	4	4	2	5	5	1	2	3	1	4	6	6	2	5	1	4	3	4	5	2	5	5	4	3	4	5	4	3	4	5	4	5	2	4	4
18	1,5	Male	12		4	4	5	1	3	4	3	24		5	1	1	5	4	6	4	2	4	1	3	6	4	3	4	2	4	1	3	5	3	3	4	6	5	5	5	3	6	6	4	1	4	3	5	5
20	1	Male	14		2	2	3	3	3	1	2	16		4	5	3	3	4	5	2	3	3	1	4	2	3	2	3	1	3	3	5	3	2	5	4	6	4	3	3	1	4	3	3	2	4	2	2	4
18	1	Male	12		4	6	6	3	5	7	4	35		5	3	5	6	5	5	3	3	5	2	6	4	5	3	5	1	5	5	5	5	3	5	3	6	5	6	4	2	2	4	5	2	5	5	6	4
22	1	Male	16		1	2	3	2	2	3	4	17		4	4	2	4	4	6	1	3	5	1	4	4	2	2	4	2	4	5	4	4	2	5	5	6	4	4	4	3	4	3	4	3	4	2	2	3
18	4	Male	12		1	6	3	1	2	1	1	15		3	1	2	6	5	6	1	1	4	3	4	6	3	6	4	6	4	6	6	6	5	6	4	6	4	1	6	2	6	6	4	2	5	3	6	2
20	1	Male	14		1	1	1	1	2	1	1	8		3	1	4	2	5	6	2	1	4	1	4	5	2	2	3	5	4	6	5	4	2	3	5	6	2	1	2	1	2	5	2	1	2	1	2	4
18	2	Male	12		2	3	3	2	3	4	2	19		2	3	3	2	2	6	3	2	4	1	4	5	4	2	4	5	3	4	5	5	3	5	4	5	4	4	5	1	6	5	3	2	4	4	4	3
21	4	Male	12		2	4	2	1	1	1	1	12		4	1	5	2	3	5	2	3	4	1	2	4	4	3	3	2	3	4	3	4	1	3	5	6	3	2	3	4	4	3	4	4	3	3	5	3
19	1	Male	14		1	1	1	1	1	2	1	8		5	1	4	1	4	6	3	3	3	2	2	6	5	3	2	3	1	4	3	4	2	3	5	4	3	4	3	2	5	5	4	4	3	4	2	1
20	4	Male	15		1	1	1	1	2	3	2	11		3	1	2	3	3	5	1	1	3	1	3	5	1	2	3	5	4	6	5	3	5	3	4	6	3	2	3	1	4	6	4	2	3	5	4	2
20	4	Male	15		2	1	1	1	1	3	2	11		3	1	2	3	4	5	2	1	4	1	5	5	5	3	2	1	3	4	3	2	2	2	4	5	2	1	1	2	5	4	6	3	1	1	2	5
19	4	Male	13		3	2	2	1	3	4	4	19		4	6	3	2	4	5	1	2	4	1	5	5	5	2	4	1	5	4	4	3	1	4	5	6	3	4	4	2	5	6	4	2	4	2	4	5
20	2	Male	14		2	2	3	1	1	3	1	13		5	4	4	5	4	6	3	2	5	1	4	4	2	4	5	4	4	5	4	3	5	4	4	6	3	5	4	1	5	5	1	4	5	2	5	4
18	4	Male	12		1	4	2	1	2	1	3	14		4	1	3	4	6	6	1	1	6	4	6	6	1	1	6	6	3	6	1	6	6	6	6	6	1	1	6	2	6	6	4	6	6	1	6	6
18	4	Male	12		4	4	2	2	3	3	4	22		5	3	4	3	4	5	1	1	4	3	4	4	4	3	3	2	2	3	4	3	3	4	4	5	3	3	4	2	5	4	4	3	3	3	3	3
19	2	Male	14		4	5	5	4	4	6	5	33		4	3	4	3	3	4	3	3	4	4	4	4	3	2	4	3	4	3	3	4	3	3	2	4	4	3	4	4	3	5	4	3	3	4	4	4
47	4	Male	14		3	3	3	3	3	3	3	21		2	5	4	3	5	4	2	3	4	2	5	5	2	2	4	3	3	5	3	3	2	4	4	5	3	3	3	2	4	4	3	2	3	3	4	4
19	4	Male	13		5	2	3	4	5	3	4	26		4	3	4	4	4	5	3	2	5	1	2	4	2	4	4	1	4	2	5	2	1	5	6	5	5	3	2	1	2	4	3	3	3	4	5	2
18	4	Male	12		2	3	3	2	3	2	3	18		4	3	4	4	3	4	5	3	5	3	4	4	5	4	3	4	4	4	3	4	4	4	5	4	4	3	5	5	5	5	3	3	3	4	4	4
22	1	Male	14		7	7	6	7	7	7	6	47		5	2	3	6	4	5	6	5	3	5	6	5	1	5	4	5	5	2	6	4	6	4	1	4	6	6	6	2	3	6	4	6	5	1	6	6
18	4	Male	12		1	1	1	1	1	2	2	9		4	4	5	2	2	5	4	3	5	1	3	6	4	4	5	3	3	5	5	4	1	4	5	5	3	3	2	1	4	5	4	3	5	4	2	3
19	4	Male	12		1	2	1	1	1	1	2	9		6	4	4	1	1	6	2	1	4	3	3	6	3	2	6	4	6	3	3	3	4	4	4	6	4	1	2	3	6	5	4	3	3	3	4	3
18	4	Male	12		2	2	1	1	3	2	1	12		4	2	3	3	4	6	2	2	4	2	4	6	5	3	4	1	4	4	3	3	1	4	6	6	3	3	3	2	5	5	4	3	4	5	4	2
18	4	Male	13		1	2	2	1	2	2	2	12		3	2	2	4	4	6	3	1	4	2	3	5	4	3	4	4	4	5	4	4	1	4	6	5	4	4	3	1	5	6	4	2	3	3	5	3
18	2	Male	12		1	1	1	1	4	1	2	11		6	6	1	1	3	5	3	6	4	1	6	6	5	5	6	3	5	6	6	5	1	1	6	6	4	4	5	1	6	6	6	6	6	6	1	1
21	4	Male	16		3	5	2	1	2	3	2	18		4	3	4	6	2	4	1	2	2	1	3	5	3	2	4	5	2	2	3	2	1	2	2	4	2	3	3	1	5	5	4	1	2	2	6	3
31	4	male	14		2	2	2	1	3	3	3	16		2	4	2	4	4	5	2	1	4	2	4	4	5	2	2	4	4	5	5	4	3	4	4	5	4	4	4	2	5	4	5	2	4	5	2	4
20	4	Male	15		4	2	3	3	4	5	5	26		3	6	4	6	4	4	3	2	3	2	3	5	4	4	5	5	3	5	3	3	5	4	4	5	6	2	4	2	4	3	6	2	4	3	2	2
18	4	Male	12		3	4	2	3	2	4	4	22		5	4	4	6	4	5	5	4	5	3	4	5	4	5	5	3	5	3	5	4	4	5	4	5	5	5	5	2	2	5	6	4	4	3	2	4
18	4	Male	12		4	5	6	4	5	6	6	36		4	2	4	5	5	6	5	2	4	5	6	5	5	5	4	4	5	4	5	5	2	5	4	3	4	5	4	3	3	3	4	4	4	3	5	4
18	4	Male	12.5		6	5	5	4	5	6	5	36		2	6	5	5	6	6	2	1	4	6	6	5	6	3	4	1	6	6	2	3	2	5	5	6	5	4	5	6	6	1	6	2	1	5	6	6
18	1	male	12		3	3	2	2	3	1	3	17		4	1	3	5	5	4	1	2	2	2	4	4	3	4	3	3	4	5	4	4	3	3	2	5	3	6	3	2	3	5	4	4	4	5	5	5
18	4	Male	12		1	3	2	1	3	2	4	16		2	2	1	6	4	6	1	1	4	1	4	6	2	3	4	2	3	5	5	3	1	3	4	5	3	2	4	1	5	4	2	3	4	1	2	4
19	4	Male	12		2	4	2	1	3	3	3	18		2	2	2	4	5	6	1	3	4	5	6	5	5	3	4	4	5	4	4	1	4	4	4	4	3	1	4	2	5	5	4	3	4	3	4	4
20	4	Male	13		4	4	4	4	5	4	5	30		5	4	4	5	5	5	3	4	5	4	5	4	5	3	4	3	5	3	3	4	1	5	5	4	3	4	4	3	4	4	5	3	4	3	4	3
18	4	Male	12		3	4	5	2	5	3	5	27		4	2	4	4	5	5	3	2	4	4	5	5	4	2	6	2	2	3	3	2	3	4	3	5	3	4	4	3	4	4	4	2	3	3	3	3
18	1	male	12		3	4	3	4	4	3	4	25		4	4	4	4	5	5	4	3	3	6	4	3	2	4	4	2	4	4	3	4	4	4	3	4	4	4	3	4	4	4	3	4	5	5	4	3
19	4	Male	13.5		1	1	1	1	2	3	2	11		2	4	5	5	5	6	1	1	5	3	4	6	4	2	4	5	3	6	4	3	4	4	2	6	3	1	3	2	6	5	5	1	4	5	6	4
18	1	Male	12		1	2	1	2	4	2	1	13		4	1	3	4	4	5	1	2	4	1	5	5	4	3	5	4	4	5	4	3	2	4	4	4	2	5	3	4	5	3	5	2	4	6	5	4
19	1	male	13		2	2	4	1	7	5	7	28		6	2	3	5	3	3	5	2	5	3	4	3	4	2	4	5	3	4	2	4	6	3	4	5	3	2	4	2	2	6	5	6	2	3	5	1
18	4	Male	12		5	5	4	3	4	6	5	32		4	3	2	5	6	4	2	1	5	3	6	4	2	2	4	4	6	4	2	3	1	3	3	4	5	5	3	1	3	2	2	2	4	2	5	6
18	4	Male	12		4	5	5	4	6	4	4	32		3	5	4	5	5	5	2	2	3	4	4	5	6	3	4	2	4	4	4	4	2	5	2	5	3	4	3	4	3	4	6	2	4	4	3	4
18	6	male	12		5	4	3	5	5	3	6	31		5	2	3	5	6	5	1	4	2	3	6	4	2	3	4	4	5	4	1	4	1	4	4	5	2	3	3	5	2	3	2	4	2	6	3	5
20	1	Male	14		2	2	2	2	3	2	2	15		4	3	4	2	3	5	1	2	3	1	2	5	3	2	4	3	4	5	3	3	1	4	5	5	3	4	2	2	5	4	4	2	3	5	2	2
19	4	Male	12		3	3	5	3	4	4	4	26		4	2	4	4	5	5	2	3	4	4	4	5	4	3	4	3	6	4	4	2	4	5	3	4	3	1	4	4	5	4	4	2	4	3	4	4
	1 = Hispanic
	2 = African American
	3 = South Asian
	4 = Caucasian
	5 = East Asian
	6 = Other
[truncated: 88 more columns]

## Sheet: Sheet2
AAQ-II	Behavioral Avoidance	Distress Aversion	Procrastination	Distraction & Suppression	Repression & Denial	Distress Endurance	MEAQ	NA	avoidance	PSS	non-avoidance
									aggregate		aggregate
13	28	40	23	32	31	62	169	0	8.5	5	27.5
27	33	44	29	32	44	47	212	14	7.5	21	21
14	30	47	19	27	39	50	189	4	9.5	14	25
27	47	48	33	28	45	42	236	12	11.5	22	19
26	46	54	25	34	47	48	235	10	10	19	24.5
42	43	61	27	34	51	35	258	10	14	12	18.5
17	30	48	29	26	37	61	186	10	9.5	14	28
29	35	42	29	34	38	42	213	12	11	25	24
36	42	60	29	34	56	50	248	8	14	17	22.5
18	36	53	26	31	36	47	212	10	10.5	20	30
30	29	42	15	23	26	47	165	18	10	24	23
9	31	40	21	26	37	44	188	7	9.5	14	25.5
12	33	51	27	23	42	47	206	16	8	16	19.5
26	56	50	24	36	37	43	237	11	9.5	19	30
28	33	38	24	23	29	44	180	16	11.5	21	27.5
14	49	67	27	33	58	51	260	11	8.5	20	32
26	31	36	31	36	46	45	212	7	11.5	17	24.5
35	36	58	16	35	37	43	216	11	12	27	29
10	27	28	15	30	30	44	163	16	9.5	19	25
13	28	38	33	32	49	54	203	9	10	13	30
31	43	52	26	33	47	47	231	9	8.5	18	27.5
23	37	44	24	29	46	47	210	14	10.5	22	19.5
30	28	30	32	18	40	62	163	5	9.5	18	22.5
10	26	28	20	22	37	46	164	5	11	15	25.5
22	42	55	27	25	45	51	220	7	10.5	26	27
31	38	52	31	26	50	42	232	19	12.5	25	26.5
32	37	48	27	35	43	38	229	10	11.5	10	23.5
12	39	46	22	22	38	52	192	2	7	14	23.5
12	37	43	27	31	38	54	199	7	11.5	25	24.5
41	55	45	29	41	56	49	254	13	12.5	30	23
9	34	38	23	22	27	50	171	7	6.5	8	25.5
41	37	61	33	36	48	51	241	20	14	26	29
24	31	45	28	17	39	44	193	19	12	10	24.5
19	28	32	28	25	35	45	180	11	12	22	30.5
13	38	47	25	30	44	40	221	6	9.5	19	24.5
16	16	19	26	17	28	61	122	6	8	10	30
27	33	44	18	29	41	46	196	7	8.5	24	22.5
13	26	27	27	24	38	58	161	7	7	12	22
36	26	34	33	28	33	60	171	12	11.5	26	31
37	50	70	36	42	64	64	275	16	12	13	35
9	35	35	29	26	30	41	191	5	10	15	22
17	43	56	27	27	50	48	232	13	7.5	19	21
14	32	44	29	29	43	55	199	2	11	18	30.5
25	33	41	28	30	39	36	212	9	7	23	16.5
30	41	40	29	33	40	41	219	19	12.5	28	25
40	32	57	33	24	45	44	224	22	9.5	30	28.5
22	38	48	24	26	42	44	211	9	11	20	24.5
9	18	31	24	23	29	66	136	2	9.5	3	33
8	30	42	28	24	36	41	196	3	8.5	14	24
19	28	34	34	16	54	54	189	10	9.5	21	22
35	31	35	34	25	43	34	211	21	11	27	22
38	38	53	25	18	51	33	229	24	9.5	32	20.5
24	24	43	23	20	32	50	169	9	9	15	28.5
8	25	31	25	21	31	61	149	5	7	12	33
33	51	62	32	35	56	39	274	18	12	21	22
29	43	55	32	33	48	42	246	11	10	13	23
44	34	44	30	34	47	48	218	16	14	30	27.5
9	37	44	21	21	39	37	202	7	7	10	22
13	24	36	26	23	31	54	163	10	9	8	26
38	20	32	32	15	31	50	157	16	12.5	32	28.5
36	43	73	30	40	56	53	266	8	9.5	27	29
36	40	61	21	40	46	46	239	13	9	32	26.5
14	32	44	25	21	32	48	183	11	9.5	24	29.5
26	35	48	27	25	43	38	217	15	9	29	24.5
12	39	55	21	32	35	53	206	3	9.5	18	27.5
19	34	43	33	24	38	51	198	7	9.5	18	26
15	27	33	29	21	31	51	167	12	10	16	28.5
22	33	42	30	27	35	55	189	15	10	26	25.5
15	27	36	27	20	31	52	166	3	8.5	26	23
12	25	32	28	20	39	53	168	8	9	16	23
24	34	43	25	27	38	45	199	24	11	7	26
22	26	35	27	24	34	59	164	17	9.5	32	24
31	37	41	33	29	51	51	217	25	13.5	32	29
18	36	50	31	31	38	59	204	13	9.5	25	26.5
22	38	50	20	22	32	53	186	13	7	16	21.5
30	40	42	35	31	61	39	247	24	14	27	22.5
27	40	47	29	29	49	44	227	25	10.5	25	27.5
38	31	42	27	29	35	35	206	28	11	35	18.5
29	36	49	31	29	46	42	226	20	12.5	23	19
22	41	37	28	25	45	47	206	23	10	31	20.5
21	42	48	28	30	36	46	215	12	8.5	19	29
11	29	34	24	20	42	56	170	14	8	15	25
30	46	47	33	26	52	40	241	27	10	32	19.5
30	52	52	35	34	58	45	263	22	8	31	14
29	33	39	26	21	44	54	186	27	12.5	25	23.5
27	43	46	30	31	46	61	212	16	10.5	13	31
21	51	58	17	26	29	38	220	14	7	17	29
27	38	44	29	26	43	61	196	17	7.5	19	20
40	47	54	31	37	56	42	260	26	11.5	26	19.5
13	33	31	26	21	44	56	176	12	9.5	27	31
42	55	55	33	37	65	43	279	30	15.5	21	24.5
28	39	50	31	29	51	37	240	23	12.5	30	15.5
24	39	46	28	32	47	41	228	17	10.5	27	25
35	47	76	29	29	58	52	264	29	13.5	34	27.5
39	28	42	28	22	40	43	194	22	11	27	31
10	25	42	22	28	32	49	177	10	8.5	18	29.5
37	43	56	31	35	50	46	246	23	12.5	28	21
15	28	43	27	22	33	53	177	14	8	18	23
31	39	32	33	27	46	39	215	20	12.5	20	22
30	48	42	29	30	46	46	226	24	12	14	24.5
17	24	34	26	24	26	57	154	15	9	19	27
32	35	49	30	26	44	41	220	20	10.5	30	26.5
25	30	35	17	19	34	35	177	15	8.5	21	29
29	52	66	28	38	51	49	263	14	6.5	27	30
26	32	42	30	28	40	47	202	23	12	34	20
14	43	46	21	27	33	46	201	13	7.5	13	20.5
42	42	56	34	36	58	51	252	31	11.5	36	28
29	42	52	27	28	42	45	223	24	9	17	26
35	42	41	28	33	47	41	227	28	13	26	21
35	46	47	30	27	45	42	230	23	12	25	22
34	41	69	17	24	34	39	223	28	15.5	35	30
29	43	49	28	28	47	48	224	19	11.5	27	22.5
19	37	50	31	28	43	45	221	20	9.5	30	30
39	36	49	30	18	47	44	213	26	14.5	35	21
18	31	57	27	30	39	45	216	16	9.5	18	23
24	34	43	33	27	49	47	216	24	11.5	26	28.5
29	38	59	30	32	45	52	229	23	8.5	13	29
17	43	52	27	28	46	47	226	12	12	27	27
20	34	39	26	28	42	46	200	19	8	23	16.5
34	51	60	31	31	55	32	273	27	14.5	34	25.5
20	34	48	26	24	40	47	202	20	10.5	22	31
25	43	46	27	25	30	44	204	26	10	25	26
30	33	44	38	17	47	49	207	26	11	31	27.5
22	40	42	23	25	34	50	191	13	9.5	19	27.5
31	45	67	33	38	58	62	256	18	13	28	33.5
25	42	54	29	28	48	48	230	23	13	25	29
38	39	46	32	29	49	44	228	23	11.5	20	24.5
28	28	30	29	25	45	55	179	20	10.5	29	25
14	38	55	22	24	35	49	202	9	6.5	20	23
31	36	48	32	36	43	53	219	16	9.5	27	30
31	36	54	28	33	47	38	237	18	14	23	24
16	25	34	23	20	28	45	162	16	9	18	23.5
29	32	44	29	29	43	52	202	13	9.5	23	26.5
34	35	51	33	28	43	43	224	23	12.5	30	28.5
34	29	48	28	25	36	47	196	25	9.5	19	24.5
17	30	42	30	21	37	51	186	12	9.5	21	29
30	43	50	30	23	50	48	225	20	11.5	21	20.5
16	33	41	27	26	34	37	201	20	11	23	28
28	39	47	28	31	49	50	221	26	12	21	18.5
15	30	41	24	27	36	51	184	10	8	19	27
36	48	69	33	35	59	45	276	35	19	36	25
34	43	52	29	32	46	29	250	28	11.5	31	21.5
25	38	51	28	27	45	43	223	21	9	26	21.5
35	37	53	31	37	48	61	222	22	11	27	28
35	37	53	31	37	48	61	222	22	11	27	28
25	37	51	26	29	46	60	206	20	10	31	31
37	41	43	29	28	47	42	223	25	8.5	29	19.5
31	47	57	30	33	58	52	250	24	17	26	29
40	34	54	34	31	55	53	232	28	11.5	35	30
22	34	41	33	28	39	50	202	21	9.5	27	27.5
14	28	40	26	23	34	48	180	14	8.5	19	25
29	46	56	30	29	53	35	256	32	14.5	31	27
31	41	44	31	30	47	47	223	20	14	24	23.5
12	35	46	28	27	38	39	212	18	12	34	25.5
18	31	44	29	25	38	49	195	6	8	26	23
24	35	48	25	23	48	53	203	13	11	17	31.5
16	30	38	26	23	36	43	187	7	11.5	27	22.5
35	43	52	31	32	47	44	238	15	12	15	21.5
17	32	42	32	26	38	55	192	8	10	18	29.5
15	44	43	32	30	50	66	210	0	9	19	27
8	25	34	32	19	37	59	165	0	9	20	26
19	33	45	27	27	44	60	193	4	10	26	25.5
12	31	38	23	25	36	46	184	2	10.5	20	23.5
8	32	41	22	22	34	55	173	8	6.5	22	21
11	34	34	24	21	39	57	172	12	10.5	13	28
11	23	32	28	14	40	52	162	8	9	26	21.5
19	28	44	30	22	36	54	183	11	9.5	25	28
13	37	44	26	26	42	50	202	7	9	20	25
14	39	46	34	29	48	66	207	13	11	19	29
22	34	43	25	27	38	49	195	10	9.5	23	28
33	38	42	21	26	44	35	213	15	12.5	11	26
21	27	36	27	26	40	46	187	8	9.5	19	30.5
26	27	51	21	27	37	40	200	12	8.5	17	21.5
18	38	52	27	30	55	49	230	12	12	33	27
47	47	55	24	27	66	40	256	21	11	16	21
9	38	45	24	27	37	54	194	6	7.5	15	24.5
9	31	46	23	26	39	53	189	1	8	9	23.5
12	26	42	30	24	27	55	171	4	8	16	28.5
12	37	42	25	21	41	55	188	1	9.5	18	25
11	48	62	33	29	42	65	226	5	9	23	31.5
18	32	38	19	23	41	44	186	12	10	16	24
16	31	42	27	25	43	51	194	17	8	22	24
26	34	50	24	27	48	45	215	25	13.5	27	28.5
22	42	58	24	31	47	42	237	16	10.5	22	23
36	47	49	29	29	51	43	239	22	11.5	28	23.5
36	34	47	37	33	57	51	234	31	14.5	22	24.5
17	40	42	24	22	44	41	208	23	15	17	22.5
16	30	36	29	22	34	57	171	20	7	20	30.5
18	33	45	29	25	46	51	204	14	14.5	21	23.5
30	38	45	30	27	41	43	215	25	9.5	20	26													0.00454545
27	31	40	25	29	48	47	203	18	9	20	33.5
25	42	47	29	27	50	46	226	23	15.5	27	27.5
11	31	37	32	30	52	66	193	10	9	24	26.5
13	36	43	32	28	41	54	203	19	9	25	19.5
28	37	48	22	26	44	39	215	23	13	24	21.5
32	35	42	35	22	42	43	210	14	12	22	24
32	36	48	29	28	51	50	219	27	14	27	25.5
31	36	34	29	27	46	36	213	28	12	34	22.5
15	29	36	26	24	35	55	172	14	6.5	17	25
26	36	44	31	28	50	51	215	17	11	24	26.5
